# Supplementary material for: Suicidal patients presenting to secondary and tertiary emergency departments and referral to a psychiatrist: a population-based descriptive study from Japan
Source: Springer Nature journal article supplement (doi:10.1186/s12888-018-1690-2), 2018-04-25
Supplement: MOESM2 [file 15719740]

**Survey of Suicidal Patients in Tochigi Prefecture**  
**Questionnaire about Suicidal Patients (Including Completed Suicide)**

For suicidal patients who visited the ER between September 1<sup>st</sup> and 30<sup>th</sup>, 2009, please enter the information about each patient visit.  
If a patient visited multiple times, please enter the information for each visit.

Date of ED visit: September ( \_\_\_\_\_ ), 2009

Sex: 1. Male 2. Female

Age: ( \_\_\_\_\_ ) years  
If exact age is unknown, estimated age ( \_\_\_\_\_ )

Address: 1. Tochigi Prefecture 2. Outside of Tochigi Prefecture 3. Unknown

Occupation: 1. In Occupation/Training  
(a. Self-employed b. Management position c. Employee d. Student e. homemaker)  
2. Unemployed 3. Unknown

Residential status: 1. Living with family 2. Living alone 3. Unknown

Mode of transport: 1. Ambulance 2. Transfer from another facility  
3. On foot 4. Other ( \_\_\_\_\_ )

Date and time of suicide attempt: Month ( \_\_\_\_\_ ) Date ( \_\_\_\_\_ ), 2009  
Time AM PM ( \_\_\_\_\_ )  
Unknown

Method of suicide: 1. Hanging 2. Jumping in front of a train 3. Jumping from height  
4. Stabbing  
a. neck b. wrist c. chest d. abdomen e. other ( \_\_\_\_\_ )  
5. Drug overdose  
a. prescription drugs --- specify ( \_\_\_\_\_ )  
b. non-prescription drugs --- specify ( \_\_\_\_\_ )  
6. Gas  
a. hydrogen sulfide b. other --- specify ( \_\_\_\_\_ )  
7. Pesticide poisoning --- specify ( \_\_\_\_\_ )  
8. Other --- specify ( \_\_\_\_\_ )  
9. Unknown

Drug abuse (including prescription drugs, but not including alcohol):  
1. Yes --- drug name ( \_\_\_\_\_ )  
2. No  
3. Unknown

History of psychiatric illnesses: 1. Yes --- diagnosis ( \_\_\_\_\_ )  
2. No  
3. Unknown

Alcohol use at the time of visit: 1. Use alcohol 2. Did not use alcohol 3. Unknown

History of alcoholism: 1. Yes 2. No 3. Unknown

Outcome: 1. Died  
2. Admitted to psychiatric department of the institution  
3. Admitted to other department of the institution --- department ( \_\_\_\_\_ )  
4. Transferred and admitted to psychiatric department of other institution  
5. Transferred and admitted to other department of other institution  
--- department ( \_\_\_\_\_ )  
6. Discharged home  
7. Other --- specify ( \_\_\_\_\_ )

Referral to a psychiatrist (Select all the apply. If none applies, select 10.):

1. Admitted to psychiatric department of the institution
  2. Admitted to psychiatric department of other institution
  3. Transferred to other institution that has a psychiatric department
  4. Evaluation by a psychiatrist of the institution
  5. Evaluation by a psychiatrist of other institution
  6. Referral paper to a psychiatrist was provided to the patient  
(confirmed to have seen a psychiatrist)
  7. Referral paper to a psychiatrist was provided to the patient  
(not confirmed to have seen a psychiatrist)
  8. Consultation to a psychiatrist via phone
  9. Other involvement by a psychiatrist --- explain ( \_\_\_\_\_ )
  10. No involvement by a psychiatrist
- Did you feel a psychiatrist was needed?  
1. No  
2. Yes, but unable --- Reason ( \_\_\_\_\_ )

Does this patient have a history of attempted suicide?

1. Yes --- Most recent suicide attempt: ( \_\_\_\_\_ ) days/months/years ago
2. No
3. Unknown

Is this patient a wrist cutter?

1. Yes
2. No
3. Unknown

Thank you for your participation.  
Please return this form by October 16<sup>th</sup>, 2009 using the enclosed envelope.

Jichi Medical University Department of Epidemiology  
Yosikazu Nakamura, MD, PhD, MPH
